# Supplementary material for: Interactive effects of drought and deforestation on multitrophic communities and aquatic ecosystem functions in the Neotropics—a test using tank bromeliads
Source: PeerJ. 2024 May 8;12:e17346. doi: 10.7717/peerj.17346 (PMC11088369; doi:10.7717/peerj.17346)
Supplement: Supplemental Information 7 — All data measurements used for analysis (general habitat conditions, litter decomposition, microorganisms, invertebrates). [file peerj-12-17346-s007.xlsx]

## Sheet: Data1_microorg
Trtmt	Mesh-size	ID_plant	Habitat	Effects	Treatment	Leaf-weight-Ergosterol	Ergosterol-(µg/gDW)	Leaf-weight-Bacteria	Attached-bacteria-(N/g)
T1	Coarse	101	Forest	control	F-Control	0.0178	248.6	0.0104	648970747.6
T1	Coarse	102	Forest	control	F-Control	0.0475	174.3	0.0263	824720184.2
T1	Coarse	103	Forest	control	F-Control	0.0174	119.5	0.0149	221287456.3
T1	Coarse	104	Forest	control	F-Control	0.0208	108.3	0.0099	559823588
T1	Coarse	105	Forest	control	F-Control	0.0288	348.4	0.0163	444223624
T1	Coarse	106	Forest	control	F-Control	0.0081	147.6	0.0071	212259472.3
T1	Coarse	107	Forest	control	F-Control	0.0382	122.6	0.0169	404617051.4
T1	Coarse	108	Forest	control	F-Control	0.0232	330.9	0.0254	865088166.8
T1	Coarse	109	Forest	control	F-Control	0.0083	173.7	0.0069	1068177179
T1	Coarse	110	Forest	control	F-Control	0.0438	231.9	0.0271	197235070.9
T2	Coarse	201	Forest	drought	F-Drought	0.0305	273.0	0.0112	1142228370
T2	Coarse	202	Forest	drought	F-Drought	0.0231	143.7	0.0146	494983600.2
T2	Coarse	203	Forest	drought	F-Drought	0.0157	212.9	0.0051	1688207677
T2	Coarse	204	Forest	drought	F-Drought	0.0093	495.9	0.0038	551519644.2
T2	Coarse	205	Forest	drought	F-Drought	0.0219	367.2	0.0287	231731854.5
T2	Coarse	206	Forest	drought	F-Drought	0.0336	242.0	0.0151	405186083.4
T2	Coarse	207	Forest	drought	F-Drought	0.0269	380.7	0.0247	122141757.4
T2	Coarse	208	Forest	drought	F-Drought	0.0068	332.1	0.0057	1132443786
T2	Coarse	209	Forest	drought	F-Drought	0.0254	330.5	0.0197	688710945.9
T2	Coarse	210	Forest	drought	F-Drought	0.0259	283.0	0.0093	747236104.8
T3	Coarse	301	Forest	deforestation	deforestation	0.0337	190.0	0.0177	985597199
T3	Coarse	302	Forest	deforestation	deforestation	0.0599	220.8	0.026	421939328.3
T3	Coarse	303	Forest	deforestation	deforestation	0.0417	324.1	0.0193	358753557.6
T3	Coarse	304	Forest	deforestation	deforestation	0.036	254.2	0.0388	835015246.1
T3	Coarse	305	Forest	deforestation	deforestation	0.0467	210.4	0.0177	388477759.2
T3	Coarse	306	Forest	deforestation	deforestation	0.0184	218.5	0.0197	1040537642
T3	Coarse	307	Forest	deforestation	deforestation	0.0124	NA	0.0075	132018779.3
T3	Coarse	308	Forest	deforestation	deforestation	0.0184	363.1	0.0116	321029626
T3	Coarse	309	Forest	deforestation	deforestation	0.035	216.6	0.0116	1702404080
T3	Coarse	310	Forest	deforestation	deforestation	0.0316	262.2	0.038	96182357.3
T4	Coarse	401	Forest	deforestation + drought	deforestation+drought	0.0431	177.7	0.0151	743307527.3
T4	Coarse	402	Forest	deforestation + drought	deforestation+drought	0.0467	277.7	0.026	75839653.3
T4	Coarse	403	Forest	deforestation + drought	deforestation+drought	0.0359	211.8	0.0427	21967872.81
T4	Coarse	404	Forest	deforestation + drought	deforestation+drought	0.0313	301.1	0.0312	28620440.59
T4	Coarse	405	Forest	deforestation + drought	deforestation+drought	0.0464	163.1	0.0147	52505509.25
T4	Coarse	406	Forest	deforestation + drought	deforestation+drought	0.0455	137.1	0.0231	65057008.72
T4	Coarse	407	Forest	deforestation + drought	deforestation+drought	0.0206	324.3	0.0255	51532725.77
T4	Coarse	408	Forest	deforestation + drought	deforestation+drought	0.0269	164.1	0.0213	56536401.51
T4	Coarse	409	Forest	deforestation + drought	deforestation+drought	0.0436	225.1	0.0174	33025740.65
T4	Coarse	410	Forest	deforestation + drought	deforestation+drought	0.0413	146.5	0.0329	56209598.01
T5	Coarse	501	Forest	deforestation_drought	deforestation_drought	0.0465	221.0	0.0324	66727525.65
T5	Coarse	502	Forest	deforestation_drought	deforestation_drought	0.042	367.3	0.0266	53478767.34
T5	Coarse	503	Forest	deforestation_drought	deforestation_drought	0.0311	147.9	0.0154	53777208.71
T5	Coarse	504	Forest	deforestation_drought	deforestation_drought	0.0543	337.3	0.0211	45524330.82
T5	Coarse	505	Forest	deforestation_drought	deforestation_drought	0.0449	333.4	0.0176	31610115.24
T5	Coarse	506	Forest	deforestation_drought	deforestation_drought	0.0537	346.3	0.0272	54991715
T5	Coarse	507	Forest	deforestation_drought	deforestation_drought	0.0238	451.1	0.0169	521876823.1
T5	Coarse	508	Forest	deforestation_drought	deforestation_drought	0.0309	237.6	0.0136	153169014.1
T5	Coarse	509	Forest	deforestation_drought	deforestation_drought	0.0304	204.8	0.0192	39539319.25
T5	Coarse	510	Forest	deforestation_drought	deforestation_drought	0.0248	280.2	0.0181	121313516.5
T6	Coarse	601	Open	control	O-Control	0.0336	106.8	0.0333	325424015.6
T6	Coarse	602	Open	control	O-Control	0.0345	177.3	0.0371	168824266.4
T6	Coarse	603	Open	control	O-Control	0.0366	169.8	0.027	325612936.9
T6	Coarse	604	Open	control	O-Control	0.0522	55.1	0.0366	97013776.65
T6	Coarse	605	Open	control	O-Control	0.0333	267.2	0.0261	329124170.3
T6	Coarse	606	Open	control	O-Control	0.0289	321.7	0.0492	202393221.1
T6	Coarse	607	Open	control	O-Control	0.0255	309.1	0.015	236713615
T6	Coarse	608	Open	control	O-Control	0.0318	132.8	0.0252	104124748.5
T6	Coarse	609	Open	control	O-Control	0.0509	163.8	0.028	163430583.5
T6	Coarse	610	Open	control	O-Control	0.049	216.5	0.0451	150463758.2
T7	Coarse	701	Open	drought	O-Drought	0.0314	82.8	0.0164	102542081.8
T7	Coarse	702	Open	drought	O-Drought	0.0284	50.1	0.0138	761890181.7
T7	Coarse	703	Open	drought	O-Drought	0.0563	52.5	0.0313	47428340.01
T7	Coarse	704	Open	drought	O-Drought	0.035	385.8	0.0206	308833584
T7	Coarse	705	Open	drought	O-Drought	0.0422	157.1	0.0244	218829369.7
T7	Coarse	706	Open	drought	O-Drought	0.0417	141.9	0.0221	25810974.44
T7	Coarse	707	Open	drought	O-Drought	0.0504	142.1	0.0274	36804770.23
T7	Coarse	708	Open	drought	O-Drought	0.028	150.6	0.0233	17650970.2
T7	Coarse	709	Open	drought	O-Drought	0.0426	252.1	0.0148	377997716
T7	Coarse	710	Open	drought	O-Drought	0.093	108.5	0.03	78450704.23
T1	Fine	101	Forest	control	F-Control	0.0286	242.2	0.0135	1110380803
T1	Fine	102	Forest	control	F-Control	0.0398	130.0	0.025	882760563.4
T1	Fine	103	Forest	control	F-Control	0.0165	48.7	0.007	812072434.6
T1	Fine	104	Forest	control	F-Control	0.0234	170.5	0.0107	1004212189
T1	Fine	105	Forest	control	F-Control	0.0255	210.5	0.0213	604245189.4
T1	Fine	106	Forest	control	F-Control	0.0222	378.2	0.0148	163018652.5
T1	Fine	107	Forest	control	F-Control	0.0266	470.6	0.0256	141670334.5
T1	Fine	108	Forest	control	F-Control	0.0139	339.4	0.0107	649335263.9
T1	Fine	109	Forest	control	F-Control	0.0268	322.6	0.0231	82007194.68
T1	Fine	110	Forest	control	F-Control	0.0208	210.4	0.0114	534964171
T2	Fine	201	Forest	drought	F-Drought	0.0217	193.2	0.0116	568722680.9
T2	Fine	202	Forest	drought	F-Drought	0.0485	143.5	0.0156	610780065
T2	Fine	203	Forest	drought	F-Drought	0.0457	280.8	0.0185	301941378
T2	Fine	204	Forest	drought	F-Drought	0.0135	217.6	0.0024	846830985.9
T2	Fine	205	Forest	drought	F-Drought	0.0323	172.2	0.0224	744655432.6
T2	Fine	206	Forest	drought	F-Drought	0.0049	334.2	0.0029	209810587.7
T2	Fine	207	Forest	drought	F-Drought	0.0303	259.0	0.0183	374971138.3
T2	Fine	208	Forest	drought	F-Drought	0.0402	204.4	0.0317	208335184.6
T2	Fine	209	Forest	drought	F-Drought	0.0252	208.5	0.0152	1014640474
T2	Fine	210	Forest	drought	F-Drought	0.0368	109.7	0.0368	376224739.7
T3	Fine	301	Forest	deforestation	deforestation	0.0375	162.5	0.0257	188030909.2
T3	Fine	302	Forest	deforestation	deforestation	0.0461	288.5	0.0333	318572093.2
T3	Fine	303	Forest	deforestation	deforestation	0.0314	179.9	0.0119	161794295.2
T3	Fine	304	Forest	deforestation	deforestation	0.0374	155.8	0.0307	592512731.1
T3	Fine	305	Forest	deforestation	deforestation	0.0283	414.6	0.025	355380281.7
T3	Fine	306	Forest	deforestation	deforestation	0.0323	171.9	0.0329	227107324.8
T3	Fine	307	Forest	deforestation	deforestation	0.0172	404.8	0.0092	379822412.7
T3	Fine	308	Forest	deforestation	deforestation	0.0069	507.2	0.0091	265903111
T3	Fine	309	Forest	deforestation	deforestation	0.0355	117.4	0.0224	303131287.7
T3	Fine	310	Forest	deforestation	deforestation	0.0381	174.5	0.0238	307728725.3
T4	Fine	401	Forest	deforestation + drought	deforestation+drought	0.0309	201.9	0.0338	347112259.4
T4	Fine	402	Forest	deforestation + drought	deforestation+drought	0.0419	360.1	0.0248	39868241.71
T4	Fine	403	Forest	deforestation + drought	deforestation+drought	0.0336	169.0	0.0456	13590313.81
T4	Fine	404	Forest	deforestation + drought	deforestation+drought	0.0494	276.6	0.0172	96708155.91
T4	Fine	405	Forest	deforestation + drought	deforestation+drought	0.0349	410.7	0.0269	6858997.853
T4	Fine	406	Forest	deforestation + drought	deforestation+drought	0.0281	210.2	0.0211	58674320.81
T4	Fine	407	Forest	deforestation + drought	deforestation+drought	0.0318	229.3	0.0107	263393444.8
T4	Fine	408	Forest	deforestation + drought	deforestation+drought	0.0431	141.3	0.0273	19192075.53
T4	Fine	409	Forest	deforestation + drought	deforestation+drought	0.0425	159.1	0.0244	27360886.63
T4	Fine	410	Forest	deforestation + drought	deforestation+drought	0.053	109.3	0.0262	16073540.48
T5	Fine	501	Forest	deforestation_drought	deforestation_drought	0.0354	364.0	0.0164	65613191.34
T5	Fine	502	Forest	deforestation_drought	deforestation_drought	0.0569	324.1	0.0349	107994672.9
T5	Fine	503	Forest	deforestation_drought	deforestation_drought	0.0374	367.1	0.0117	151920067.4
T5	Fine	504	Forest	deforestation_drought	deforestation_drought	0.0444	294.8	0.0306	52563748.5
T5	Fine	505	Forest	deforestation_drought	deforestation_drought	0.0208	374.9	0.0138	152684221.3
T5	Fine	506	Forest	deforestation_drought	deforestation_drought	0.0235	281.0	0.0189	79812206.57
T5	Fine	507	Forest	deforestation_drought	deforestation_drought	0.0407	295.9	0.0237	420871218.9
T5	Fine	508	Forest	deforestation_drought	deforestation_drought	0.0349	236.8	0.0401	70457658.67
T5	Fine	509	Forest	deforestation_drought	deforestation_drought	0.0392	261.1	0.0271	43552829.89
T5	Fine	510	Forest	deforestation_drought	deforestation_drought	0.0207	280.7	0.0073	326837738.8
T6	Fine	601	Open	control	O-Control	0.0619	96.3	0.0316	218131574.3
T6	Fine	602	Open	control	O-Control	0.0521	115.1	0.029	317289946.6
T6	Fine	603	Open	control	O-Control	0.0375	40.8	0.0339	254310523.9
T6	Fine	604	Open	control	O-Control	0.0446	64.5	0.0343	93787213.07
T6	Fine	605	Open	control	O-Control	0.0334	60.9	0.0377	175888220.6
T6	Fine	606	Open	control	O-Control	0.0433	140.3	0.0238	134276245.7
T6	Fine	607	Open	control	O-Control	0.0081	356.7	0.007	290945674
T6	Fine	608	Open	control	O-Control	0.0392	117.4	0.0358	566173577.8
T6	Fine	609	Open	control	O-Control	0.0448	146.8	0.0274	199753264.1
T6	Fine	610	Open	control	O-Control	0.028	233.5	0.0374	459591775.3
T7	Fine	701	Open	drought	O-Drought	0.0329	52.8	0.028	109808853.1
T7	Fine	702	Open	drought	O-Drought	0.0216	72.8	0.0224	266536720.3
T7	Fine	703	Open	drought	O-Drought	0.033	159.2	0.0235	36859454.6
T7	Fine	704	Open	drought	O-Drought	0.0255	241.1	0.0262	234168369
T7	Fine	705	Open	drought	O-Drought	0.047	191.2	0.0339	350326145.7
T7	Fine	706	Open	drought	O-Drought	0.0497	273.5	0.0263	59979649.76
T7	Fine	707	Open	drought	O-Drought	0.0355	107.2	0.0208	36091549.3
T7	Fine	708	Open	drought	O-Drought	0.0364	152.2	0.0259	23546685.52
T7	Fine	709	Open	drought	O-Drought	0.0228	281.0	0.0159	350695367.2
T7	Fine	710	Open	drought	O-Drought	0.0365	152.1	0.0239	336201308.3

## Sheet: Data2_general
Trtmt	ID_plant	Habitat	Effects	couleur rubalise	Leaves (green)	Leaves (dry)	Diam 1	Diam 2	Diam	Height	pH	Conductivity	sampling blocks	vol.collected.mL	light.percent
T1	101	Forest	control	rose	13	12	133.1	128.4	130.75	109	6.03	10.4	1	650	19.67
T1	102	Forest	control	rose	10	10	120.7	68.4	94.55	93.4	5.08	7.9	1	1300	21.84
T1	103	Forest	control	rose	16	1	86.2	61.5	73.85	67.1	4.57	9.3	2	520	21.29
T1	104	Forest	control	rose	12	4	130.5	126	128.25	86.7	4.88	15	2	238	23.16
T1	105	Forest	control	rose	12	8	119.5	127.6	123.55	82	4.67	26.9	3	634	15.58
T1	106	Forest	control	rose	11	3	89.2	82.6	85.9	47	5.32	22	3	250	23.9
T1	107	Forest	control	rose	15	4	154.6	109.3	131.95	97.3	5.71	19.6	4	368	15.88
T1	108	Forest	control	rose	12	7	166.4	162.1	164.25	127.8	5.9	57.9	4	463	18.55
T1	109	Forest	control	rose	13	6	115	58	86.5	80	4.61	8.4	5	442	12.04
T1	110	Forest	control	rose	10	8	123.6	95	109.3	111.7	4.7	9.6	5	259	13.41
T2	301	Forest	deforestation	orange	26	3	146	138.5	142.25	84.5	5.04	46.2	1	610	71.71
T2	302	Forest	deforestation	orange	16	2	148	102	125	94.8	4.75	12.2	1	464	75.56
T2	303	Forest	deforestation	orange	12	5	129	122	125.5	106.5	5.24	27	2	410	61.45
T2	304	Forest	deforestation	orange	17	5	146.6	133.3	139.95	85.6	5.51	26.7	2	998	66.65
T2	305	Forest	deforestation	orange	13	3	121	120	120.5	85	4.78	8.5	3	430	77.1
T2	306	Forest	deforestation	orange	16	7	152	136.8	144.4	99.9	5.46	21.9	3	558	68.84
T2	307	Forest	deforestation	orange	17	5	139.7	89.6	114.65	102	4.41	15.7	4	298	67.06
T2	308	Forest	deforestation	orange	14	8	151.3	129.2	140.25	76.2	5.53	24.8	4	440	50.19
T2	309	Forest	deforestation	orange	15	9	164.3	119.2	141.75	104.7	5.78	63.5	5	656	56.77
T2	310	Forest	deforestation	orange	12	7	109.6	105.8	107.7	80.3	4.58	9	5	758	60.31
T3	201	Forest	drought	blanc	16	11	149.6	130.4	140	115.2	5.3	11.3	1	10	20.47
T3	202	Forest	drought	blanc	13	5	131.5	110.3	120.9	82.9	5.23	16.3	1	13	20.31
T3	203	Forest	drought	blanc	11	2	136.4	79.6	108	97.7	5.18	12.3	2	0	15.09
T3	204	Forest	drought	blanc	16	4	174.7	160	167.35	101.4	5.66	21.8	2	32	19.71
T3	205	Forest	drought	blanc	16	3	149	136	142.5	77	5.46	40.3	3	20	21.32
T3	206	Forest	drought	blanc	17	1	106.7	105	105.85	66	5.33	10.3	3	100	17.53
T3	207	Forest	drought	blanc	7	7	151.8	88.6	120.2	96.4	5.5	19.1	4	10	36.32
T3	208	Forest	drought	blanc	14	1	111	94.5	102.75	90	5.02	22.2	4	133	9.93
T3	209	Forest	drought	blanc	11	5	127.8	112.7	120.25	76	5.27	25.2	5	35	16.67
T3	210	Forest	drought	blanc	12	2	131	104	117.5	75	4.85	15.5	5	126	16.79
T4	401	Forest	deforestation + drought	Jaune	16	4	134	120	127	98.8	5.22	21.6	1	0	57.07
T4	402	Forest	deforestation + drought	Jaune	14	6	144.2	119.5	131.85	79.5	5.69	20.5	1	168	60.3
T4	403	Forest	deforestation + drought	Jaune	12	3	126.5	117.5	122	64.5	4.96	12.1	2	0	58.54
T4	404	Forest	deforestation + drought	Jaune	15	2	129.7	115.6	122.65	76.4	4.71	11.2	2	0	53.53
T4	405	Forest	deforestation + drought	Jaune	10	4	91	83.4	87.2	71	4.67	9.3	3	0	73.2
T4	406	Forest	deforestation + drought	Jaune	14	5	142.4	129.7	136.05	97.2	4.89	13.4	3	0	74.5
T4	407	Forest	deforestation + drought	Jaune	16	8	153.6	128.9	141.25	84.9	5.79	40.2	4	0	48.9
T4	408	Forest	deforestation + drought	Jaune	10	4	169.1	126.9	148	87.7	5.88	34.5	4	0	66.63
T4	409	Forest	deforestation + drought	Jaune	12	4	111.2	99.8	105.5	53	5.47	36.2	5	0	67.74
T4	410	Forest	deforestation + drought	Jaune	15	3	130.5	99.6	115.05	86	5.13	20.4	5	0	69.28
T5	501	Forest	deforestation_drought	rose/noir	17	5	176	176	176	94.5	5.29	17.1	1	0	66.96
T5	502	Forest	deforestation_drought	rose/noir	10	6	134	105.3	119.65	95.7	6.08	52.2	1	0	64.51
T5	503	Forest	deforestation_drought	rose/noir	15	6	147.2	143	145.1	81.6	5.48	18.7	2	0	57.27
T5	504	Forest	deforestation_drought	rose/noir	17	2	133.4	98.2	115.8	60.7	5.19	16.5	2	0	78.62
T5	505	Forest	deforestation_drought	rose/noir	12	6	136	121	128.5	91	4.9	17	3	0	70.03
T5	506	Forest	deforestation_drought	rose/noir	13	4	150.4	128.8	139.6	79	4.96	23.6	3	0	64.27
T5	507	Forest	deforestation_drought	rose/noir	12	10	187.4	182.5	184.95	98.6	5.58	16.2	4	0	51.05
T5	508	Forest	deforestation_drought	rose/noir	8	7	220.1	206	213.05	105.5	5.9	53.3	4	0	76.64
T5	509	Forest	deforestation_drought	rose/noir	15	7	108.4	105.3	106.85	62	4.71	10.4	5	0	67.74
T5	510	Forest	deforestation_drought	rose/noir	15	3	136	134	135	91	5.2	31.5	5	0	68.69
T6	601	Open	control	bleu	10	12	61.5	42.7	52.1	42,8	5.37	7.9	1	1409	57.7
T6	602	Open	control	bleu	14	7	58.4	55.4	56.9	49,8	5.49	19.3	1	1360	64.23
T6	603	Open	control	bleu	8	12	58.9	53.2	56.05	89,4	5.81	12.1	2	3000	64.85
T6	604	Open	control	bleu	8	11	64	48.5	56.25	64	6.13	11.1	2	1714	71.1
T6	605	Open	control	bleu	9	10	52.4	46.7	49.55	43.4	4.86	6.2	3	1464	74.21
T6	606	Open	control	bleu	12	11	64.7	58.4	61.55	62.5	5.48	14.5	3	2520	71.38
T6	607	Open	control	bleu	13	5	89.8	79.8	84.8	58,9	5.23	16	4	841	48.83
T6	608	Open	control	bleu	11	6	61.6	55.7	58.65	62.3	5.06	11.1	4	526	36.3
T6	609	Open	control	bleu	12	8	55.2	54.5	54.85	52,7	5.01	7.1	5	1261	45.68
T6	610	Open	control	bleu	12	6	68.9	38.2	53.55	47.1	5	8.2	5	803	45.13
T7	701	Open	drought	blanc	10	8	70.3	63.4	66.85	65,3	5.55	9.3	1	0	77.62
T7	702	Open	drought	blanc	16	13	75.4	72.3	73.85	58,5	5.29	8.7	1	108	63.75
T7	703	Open	drought	blanc	10	9	65.7	38.7	52.2	56,4	5.22	8.6	2	48	56.49
T7	704	Open	drought	blanc	13	6	57.1	53.3	55.2	47.9	4.93	7.9	2	320	65.96
T7	705	Open	drought	blanc	13	9	50.8	43.4	47.1	52.2	5.29	10.8	3	422	67.28
T7	706	Open	drought	blanc	10	9	54.5	51.5	53	52.2	5.75	6.8	3	100	72.74
T7	707	Open	drought	blanc	15	0	70.4	69.9	70.15	62,5	4.99	14.3	4	60	59.39
T7	708	Open	drought	blanc	10	5	56.8	50	53.4	50.6	5.2	10.2	4	0	74.65
T7	709	Open	drought	blanc	13	4	59.6	48.2	53.9	50.4	5.05	9.7	5	210	54.78
T7	710	Open	drought	blanc	13	7	68.7	62.6	65.65	57,2	5.46	10.8	5	220	66.54

## Sheet: Data3_decomposition
Trtmt	ID_plant	Habitat	Effects	initial.dry.mass.coarse.g	initial.dry.mass.fine.g	final.dry.mass.coarse.g	final.dry.mass.fine.g	mass.loss.coarse.%	mass.loss.fine.%
T1	101	Forest	control	0.0793	0.0854	0.0207	0.0509	73.8966	40.3981
T1	102	Forest	control	0.0783	0.0744	0.0609	0.044	22.2222	40.8602
T1	103	Forest	control	0.072	0.0707	0.0226	0.0229	68.6111	67.6096
T1	104	Forest	control	0.0743	0.0893	0.0204	0.05	72.5437	44.009
T1	105	Forest	control	0.0821	0.0806	0.0262	0.0541	68.0877	32.8784
T1	106	Forest	control	0.0777	0.09	0.0018	0.0186	97.6834	79.3333
T1	107	Forest	control	0.1002	0.0949	0.0749	0.0612	25.2495	35.5111
T1	108	Forest	control	0.0725	0.0684	0.0551	0.0286	24	58.1871
T1	109	Forest	control	0.0736	0.0797	0.0138	0.0406	81.25	49.059
T1	110	Forest	control	0.0724	0.093	0.048	0.0292	33.7017	68.6022
T2	201	Forest	drought	0.07	0.0693	0.0245	0.0349	65	49.6392
T2	202	Forest	drought	0.0584	0.0632	0.0174	0.03	70.2055	52.5316
T2	203	Forest	drought	0.0788	0.0806	0.0023	0.034	97.0812	57.8164
T2	204	Forest	drought	0.0719	0.0847	0.0137	0.0071	80.9458	91.6175
T2	205	Forest	drought	0.0814	0.0913	0.029	0.057	64.3735	37.5685
T2	206	Forest	drought	0.0714	0.0742	0.032	0.0032	55.1821	95.6873
T2	207	Forest	drought	0.082	0.078	0.0389	0.0319	52.561	59.1026
T2	208	Forest	drought	0.0821	0.0791	0.0148	0.0445	81.9732	43.7421
T2	209	Forest	drought	0.0765	0.0792	0.0484	0.0328	36.732	58.5859
T2	210	Forest	drought	0.0976	0.082	0.0152	0.053	84.4262	35.3659
T3	301	Forest	deforestation	0.088	0.0797	0.034	0.0628	61.3636	21.2045
T3	302	Forest	deforestation	0.0635	0.0865	0.045	0.0602	29.1339	30.4046
T3	303	Forest	deforestation	0.0669	0.0915	0.0412	0.0335	38.4155	63.388
T3	304	Forest	deforestation	0.0904	0.637	0.0612	0.0441	32.3009	93.0769
T3	305	Forest	deforestation	0.0724	0.9	0.0438	0.046	39.5028	94.8889
T3	306	Forest	deforestation	0.0689	0.0725	0.0382	0.0407	44.5573	43.8621
T3	307	Forest	deforestation	0.081	0.593	0.0094	0.0151	88.3951	97.4536
T3	308	Forest	deforestation	0.0708	0.0599	0.0111	0.0058	84.322	90.3172
T3	309	Forest	deforestation	0.0857	0.082	0.0604	0.0628	29.5216	23.4146
T3	310	Forest	deforestation	0.814	0.0682	0.0552	0.0457	93.2187	32.9912
T4	401	Forest	deforestation + drought	0.0732	0.0836	0.0521	0.0569	28.8251	31.9378
T4	402	Forest	deforestation + drought	0.0796	0.0776	0.0421	0.0566	47.1106	27.0619
T4	403	Forest	deforestation + drought	0.0789	0.0912	0.0605	0.0654	23.3207	28.2895
T4	404	Forest	deforestation + drought	0.0872	0.0632	0.063	0.0395	27.7523	37.5
T4	405	Forest	deforestation + drought	0.0819	0.0704	0.0509	0.0519	37.851	26.2784
T4	406	Forest	deforestation + drought	0.0835	0.0826	0.0531	0.0486	36.4072	41.1622
T4	407	Forest	deforestation + drought	0.0919	0.1035	0.0697	0.0715	24.1567	30.9179
T4	408	Forest	deforestation + drought	0.0799	0.0722	0.0225	0.0499	71.8398	30.8864
T4	409	Forest	deforestation + drought	0.0652	0.0655	0.0472	0.0422	27.6074	35.5725
T4	410	Forest	deforestation + drought	0.0721	0.0912	0.0516	0.0688	28.4327	24.5614
T5	501	Forest	deforestation_drought	0.0701	0.0809	0.053	0.0555	24.3937	31.3968
T5	502	Forest	deforestation_drought	0.085	0.0719	0.068	0.0638	20	11.2656
T5	503	Forest	deforestation_drought	0.0728	0.0817	0.0293	0.0561	59.7527	31.3341
T5	504	Forest	deforestation_drought	0.0706	0.0978	0.0373	0.0629	47.1671	35.6851
T5	505	Forest	deforestation_drought	0.1015	0.0673	0.0206	0.0955	79.7044	-41.9019
T5	506	Forest	deforestation_drought	0.0743	0.0859	0.051	0.0536	31.3594	37.6019
T5	507	Forest	deforestation_drought	0.0928	0.0768	0.0443	0.0563	52.2629	26.6927
T5	508	Forest	deforestation_drought	0.0756	0.0653	0.0308	0.0469	59.2593	28.1776
T5	509	Forest	deforestation_drought	0.0935	0.0826	0.0666	0.047	28.7701	43.0993
T5	510	Forest	deforestation_drought	0.071	0.0831	0.0165	0.0236	76.7606	71.6005
T6	601	Open	control	0.072	0.0783	0.0554	0.0581	23.0556	25.7982
T6	602	Open	control	0.0715	0.0962	0.0577	0.0723	19.3007	24.8441
T6	603	Open	control	0.0609	0.0711	0.0427	0.056	29.8851	21.2377
T6	604	Open	control	0.0548	0.0763	0.038	0.0577	30.6569	24.3775
T6	605	Open	control	0.0804	0.0809	0.0611	0.0583	24.005	27.9357
T6	606	Open	control	0.0775	0.0644	0.0569	0.0475	26.5806	26.2422
T6	607	Open	control	0.0908	0.0746	0.0329	0.0219	63.7665	70.6434
T6	608	Open	control	0.0684	0.0993	0.0445	0.078	34.9415	21.4502
T6	609	Open	control	0.0829	0.0646	0.0661	0.0472	20.2654	26.935
T6	610	Open	control	0.0868	0.1074	0.0637	0.0806	26.6129	24.9534
T7	701	Open	drought	0.0702	0.0845	0.0455	0.0662	35.1852	21.6568
T7	702	Open	drought	0.0938	0.0846	0.0367	0.0517	60.8742	38.8889
T7	703	Open	drought	0.0899	0.0607	0.0522	0.0425	41.9355	29.9835
T7	704	Open	drought	0.0756	0.0749	0.0567	0.0525	25	29.9065
T7	705	Open	drought	0.06	0.0796	0.045	0.0611	25	23.2412
T7	706	Open	drought	0.0809	0.0646	0.0286	0.0466	64.6477	27.8638
T7	707	Open	drought	0.0743	0.0664	0.0506	0.0483	31.8977	27.259
T7	708	Open	drought	0.0734	0.0735	0.0485	0.0443	33.9237	39.7279
T7	709	Open	drought	0.0757	0.0635	0.0446	0.0389	41.0832	38.7402
T7	710	Open	drought	0.0648	0.0802	0.0488	0.0569	24.6914	29.0524

## Sheet: Data4_invertebrates
	Dry.weight.mg	101	102	103	104	105	106	107	108	109	110	201	202	203	204	205	206	207	208	209	210	301	302	303	304	305	306	307	308	309	310	401	402	403	404	405	406	407	408	409	410	501	502	503	504	505	506	507	508
Copepoda	0.012	0	0	0	0	1	0	0	0	0	0	0	0	0	0	0	0	0	0	0	0	0	0	0	0	0	0	0	0	0	0	0	0	0	0	0	0	0	0	0	0	0	0	0	0	0	0	0	0
Elpidium.bromeliarum	0.058	0	0	7	145	95	1	14	12	19	0	4	1	0	0	1	0	1	2	1	0	1	1	0	2	0	0	0	0	0	0	0	0	0	0	0	0	0	0	0	0	1	1	0	0	1	0	0	23
Aulophorus.superterrenus	0.056	14	132	9	3	18	12	2	42	33	12	5	0	3	12	7	8	7	2	54	2	6	22	0	3	1	5	73	23	84	53	1	3	12	0	3	2	0	0	8	34	0	0	0	0	0	0	0	0
Pristina.osborni	0.01	0	0	0	0	0	0	0	0	1	0	0	0	0	0	0	0	0	0	0	0	0	0	0	0	0	0	0	0	0	0	0	0	0	0	0	0	0	0	0	0	0	0	0	0	0	0	0	0
Enchytraeidae	0.2925	0	0	1	0	0	0	0	0	0	0	0	0	3	0	3	0	0	0	0	0	0	0	0	0	0	0	0	0	0	0	0	0	0	0	0	0	0	0	0	0	0	0	0	0	0	0	0	0
Plathyhelminthe_small	0.01	9200	0	0	2	0	6	0	0	2	0	0	0	0	0	0	0	0	0	0	0	0	0	0	0	0	0	0	0	0	0	0	0	0	0	0	0	0	0	0	0	0	0	0	0	0	0	0	0
Microculex.stonei_st1	0.0022	0	0	0	0	0	0	0	0	0	0	0	0	0	0	0	0	0	0	0	0	0	0	0	0	0	0	0	0	0	0	0	0	0	0	0	0	0	0	0	0	0	0	0	0	0	0	0	0
Microculex.stonei_st2	0.0037	0	0	0	0	2	0	0	1	0	0	0	0	0	0	0	0	0	0	0	0	0	0	0	0	0	1	0	0	0	0	0	0	0	0	0	0	0	0	0	0	0	0	0	0	0	0	0	0
Microculex.stonei_st3	0.018	0	3	0	0	4	0	2	2	0	0	0	0	0	0	0	0	0	0	1	0	0	0	0	0	0	0	0	0	2	0	0	0	0	0	0	0	0	0	0	0	0	0	0	0	0	0	0	0
Microculex.stonei_st4	0.1044	0	0	0	0	7	0	0	7	0	0	0	0	0	1	0	0	0	0	0	0	0	0	0	0	0	0	0	0	0	0	1	0	0	0	0	0	0	0	0	0	0	0	0	0	0	0	0	0
Microculex.stonei_st5	0.1335	0	0	0	0	0	0	0	0	0	0	0	0	0	0	0	0	0	0	0	0	0	0	0	1	0	0	0	0	0	0	0	0	0	0	0	0	0	0	0	0	0	0	0	0	0	0	0	0
Wyeomyia.sp_st2	0.0377	0	0	0	0	0	0	0	0	0	0	0	0	0	0	0	0	0	0	0	0	0	0	0	0	0	0	0	0	0	0	0	0	0	0	0	0	0	0	0	0	0	0	0	0	0	0	0	0
Wyeomyia.sp_st3	0.09175	0	0	0	0	1	0	0	0	0	0	0	0	0	0	0	0	0	0	0	0	0	0	0	0	0	0	0	0	0	0	0	0	0	0	0	0	0	0	0	0	0	0	0	0	0	0	0	0
Wyeomyia.sp_st4	0.176	0	0	0	0	1	0	0	0	0	0	0	0	0	0	0	0	0	0	0	0	0	0	0	0	0	0	0	0	0	0	0	0	0	0	0	0	0	0	0	0	0	0	0	0	0	1	0	0
Corethrella.sp_st2	0.0156	0	0	0	0	0	0	0	0	0	0	0	0	0	0	0	0	0	0	0	0	0	0	0	0	0	0	0	0	0	0	0	0	0	0	0	0	0	0	0	0	0	0	0	0	0	0	0	0
Corethrella.sp_st3	0.041	0	0	0	0	0	0	0	0	0	0	0	0	0	0	0	0	0	0	0	0	0	0	0	0	0	0	0	0	0	0	0	0	0	0	0	0	0	0	0	0	0	0	0	0	0	0	0	0
Corethrella.sp_st4	0.0559	0	0	0	0	0	0	0	0	0	0	0	0	0	0	0	0	0	0	0	0	0	1	0	0	0	0	0	0	0	0	0	0	0	0	0	0	0	0	0	0	0	0	0	0	0	0	0	0
Tanytarsus.sp_st2	0.02	0	0	0	0	0	0	0	0	0	0	0	0	0	0	0	0	0	0	0	0	0	0	0	0	0	0	1	0	0	0	0	0	0	0	0	0	0	0	0	0	0	0	0	0	0	0	0	0
Tanytarsus.sp_st3	0.043	0	0	0	0	0	0	0	2	0	0	0	0	0	0	0	0	0	0	3	0	0	0	0	0	0	0	0	0	0	0	0	0	0	0	0	0	0	0	0	0	0	0	0	0	0	0	0	0
Tanytarsus.sp_st4	0.075	0	1	6	0	2	0	1	1	1	8	0	0	0	1	0	0	9	0	1	8	1	0	3	0	0	0	1	11	1	0	0	0	0	0	0	0	0	0	0	0	0	0	0	0	0	0	0	0
Bezzia.sp1	0.101	0	0	0	0	0	0	0	0	0	0	0	0	0	0	0	0	0	0	0	0	0	0	0	0	0	0	0	0	0	0	0	0	0	0	0	0	0	0	0	0	0	0	0	0	0	0	0	0
Cecidomyiidae	0.03	0	0	0	0	0	0	0	0	2	0	0	0	0	0	0	0	0	0	0	0	0	0	0	0	0	0	0	0	0	0	0	0	0	0	0	0	0	0	0	0	0	0	0	0	0	0	0	0
Telmatoscopus	0.3	0	0	0	0	0	0	0	0	0	0	0	0	0	0	0	0	0	0	0	0	0	0	0	0	0	0	0	0	0	0	0	0	0	0	0	0	0	0	0	0	0	0	0	0	0	0	0	0
Chironomini	0.083	0	0	0	0	3	0	1	2	0	2	0	0	0	0	4	0	0	0	0	0	0	0	0	0	0	0	0	0	0	0	0	0	0	0	0	0	0	0	0	0	13	0	0	0	0	0	0	0
Tanypodinae.sp	0.04	0	0	1	1	17	0	0	1	1	1	1	2	0	0	1	0	0	0	0	0	1	1	0	0	0	0	1	0	0	1	0	0	0	0	0	0	0	0	0	0	0	0	0	0	0	0	0	0
Dolichopodidae	0.5882	0	0	0	1	0	0	0	0	0	0	0	0	0	0	0	0	0	0	0	0	0	0	0	0	0	0	0	0	0	0	0	0	0	0	0	0	0	0	0	0	0	0	0	0	0	0	0	0
Tabanidae	9.7	0	0	0	0	0	0	0	0	0	0	0	0	0	0	0	0	0	0	0	0	0	0	0	0	0	0	0	0	1	0	0	0	0	0	0	0	0	0	0	0	0	0	0	0	0	0	0	0
Trentepohlia.sp1_st1	0.0316	0	0	0	0	0	0	0	0	0	0	1	0	0	0	0	0	0	0	0	0	0	0	0	0	0	0	0	0	0	0	0	0	0	0	0	0	0	0	0	0	0	0	0	0	0	0	0	0
Trentepohlia.sp1_st2	0.1621	0	0	0	0	1	0	1	0	0	0	2	1	0	1	0	1	0	2	0	0	0	1	1	0	0	0	0	0	0	0	0	1	0	0	0	0	0	0	0	0	2	0	0	0	0	0	0	1
Trentepohlia.sp1_st3	0.5882	0	0	0	0	1	1	0	0	0	1	3	0	0	0	1	3	0	1	2	3	0	0	0	0	0	1	2	0	1	0	0	0	0	0	0	0	0	0	0	0	0	0	0	0	0	0	0	0
Trentepohlia.sp1_st4	0.9775	0	0	0	5	7	0	0	4	0	0	1	0	3	2	1	0	2	3	5	10	0	0	3	2	0	0	0	0	0	1	0	0	0	0	0	0	0	0	0	0	0	0	1	0	0	0	0	0
Trentepohlia.sp1_st5	1.037	0	0	2	0	0	0	0	1	2	0	0	0	2	3	0	3	2	1	0	6	0	0	0	0	1	0	3	0	0	0	0	0	0	0	0	0	0	0	0	0	0	0	0	0	0	0	0	0
Trentepohlia.sp2_st4	0.9775	0	0	0	0	0	0	0	0	0	0	0	0	1	0	0	0	0	0	0	0	0	0	0	0	0	0	0	0	0	0	0	0	0	0	0	0	0	0	0	0	0	0	0	0	0	0	0	0
Scirtes.sp_st1	0.0259	0	0	0	0	0	0	0	0	0	0	0	0	0	0	0	0	0	0	0	0	0	0	0	0	0	0	0	0	0	0	0	0	0	0	0	0	0	0	0	0	0	0	1	0	0	0	0	0
Scirtes.sp_st2	0.0598	0	0	0	0	0	0	0	0	0	0	0	0	0	0	0	0	0	0	0	0	0	0	0	0	0	0	0	0	0	0	0	0	0	0	0	0	0	0	0	0	0	0	0	0	0	0	0	0
Scirtes.sp_st3	0.0975	0	0	1	0	0	6	0	0	2	1	1	2	0	0	0	0	0	0	0	0	0	0	0	0	0	0	1	0	1	0	0	0	0	0	0	0	0	0	0	0	0	0	0	0	0	0	0	0
Scirtes.sp_st4	0.1644	0	0	0	0	0	0	0	0	1	0	0	0	0	0	0	0	0	0	1	0	0	0	0	0	0	0	0	0	0	0	0	0	0	0	0	0	0	0	0	0	0	0	0	0	0	0	0	0
Scirtes.sp_st5	0.3386	2	0	0	7	0	5	4	0	0	0	1	0	0	0	0	0	0	0	4	0	0	0	0	1	0	0	0	0	0	0	0	0	0	0	0	0	0	0	0	0	0	0	0	0	0	0	0	0
Scirtes.sp_>st5	0.4649	0	0	4	4	3	8	2	2	0	0	0	0	0	0	0	0	0	0	0	0	2	0	0	0	0	0	0	1	0	0	0	0	0	0	0	0	0	0	0	0	0	0	0	0	0	0	0	0
Sphaeridinae.larva_8mm	0.73	0	0	0	2	0	0	0	0	0	0	0	0	0	0	0	0	0	0	0	0	0	0	0	0	0	0	0	0	0	0	1	0	0	0	0	0	0	0	0	0	0	0	0	0	0	0	0	0
Erythrodiplax_small	0.3	0	0	0	0	0	0	0	0	0	0	0	0	0	0	0	0	0	0	0	0	0	0	0	0	0	0	0	0	0	0	0	0	0	0	0	0	0	0	0	0	0	0	0	0	0	0	0	0
Erythrodiplax_medium	1.1	0	0	0	0	0	0	0	0	0	0	0	0	0	0	0	0	0	0	0	0	0	0	0	0	0	0	0	0	0	3	0	0	0	0	0	0	0	0	0	0	0	0	0	0	0	0	0	0
Erythrodiplax_large	7.9	0	0	0	0	0	0	0	0	0	0	0	0	0	0	0	0	0	0	0	0	0	0	0	0	0	0	0	0	0	0	0	0	0	0	0	0	0	0	0	0	0	0	0	0	0	0	0	0
Leptagrion.sp1_small	0.0675	0	1	2	0	0	0	0	0	1	0	0	0	0	0	0	0	0	0	0	0	0	0	0	0	0	2	2	1	0	3	0	0	0	0	0	0	0	0	0	0	0	0	0	0	0	0	0	0
Leptagrion.sp1_medium	0.55	1	0	0	1	0	1	2	0	0	0	0	0	0	1	0	0	0	0	0	0	0	0	1	0	1	0	0	0	0	0	0	0	0	0	0	0	0	0	0	0	0	0	0	0	0	0	0	0
Leptagrion.sp1_large	5.9	0	0	0	0	1	0	0	0	0	0	0	0	0	0	0	0	0	0	0	0	0	0	0	0	0	0	0	0	1	3	0	0	0	0	0	0	0	0	0	0	0	0	0	0	0	0	0	0
Leptagrion.sp2_large	9.3	0	0	0	0	0	0	0	0	1	1	0	0	0	0	0	0	1	0	0	0	0	0	0	0	0	0	0	0	0	0	0	0	0	0	0	0	0	0	0	0	0	0	0	0	0	0	0	0
[truncated: 22 more columns]
